# Supplementary material
Source: PubMed Central journal article supplement (PMC2662002)
Supplement: M802159200_1.pdf [file M802159200_1.pdf]

## Supplementary Materials

### Spectroscopic properties of synthesized compounds

**Trimethyl *cis*-homoaconitate 5a** (trimethyl (1*Z*)-but-1-ene-1,2,4-tricarboxylate). Yellow oil. <sup>1</sup>H NMR (400 MHz, CDCl<sub>3</sub>, δ): 5.90 (s, CH=C, 1H), 3.83 (s, OCH<sub>3</sub>, 3H), 3.73 (s, OCH<sub>3</sub>, 3H), 3.70 (s, OCH<sub>3</sub>, 3H), 2.69 (t, *J* = 7.5 Hz, CH=C-CH<sub>2</sub>, 2H), 2.55 (t, *J* = 7.3 Hz, CH<sub>2</sub>-CH<sub>2</sub>-CO-, 2H).

<sup>13</sup>C NMR (100 MHz, CDCl<sub>3</sub>+TMS, δ): 172.2 (OC=O), 168.6 (OC=O), 165.3 (OC=O), 147.8 (C-2), 120.9 (C-1), 52.5 (OMe), 51.95 (OMe), 51.90 (OMe), 31.5 (CH<sub>2</sub>), 29.2 (CH<sub>2</sub>).

GC-MS (CI+, CH<sub>4</sub>) *m/z* (% relative intensity, ion): 139 (100%), 167 (71%), 199 (47%), 140 (8%), 259 (2%, M + C<sub>2</sub>H<sub>5</sub><sup>+</sup>). GC-MS/MS (199 *m/z*): 139 (100%), 167 (23%), 111 (6%), 127 (5%).

HRMS-CI (*m/z*): M<sup>-</sup> calcd for C<sub>10</sub>H<sub>14</sub>O<sub>6</sub> 230.0790; found, 230.0786.

NOE difference spectroscopy: Irradiation at 5.90 ppm shows enhanced resonances at 3.73, 2.69 and 2.55 ppm. Irradiation at 2.69 ppm shows enhanced resonances at 5.90 and 3.83 ppm. High-resolution <sup>1</sup>H-NMR indicates the vinylic proton is coupled to a methylene group (*J* = 1.3 Hz).

#### **Sodium *cis*-homoaconitate.**

<sup>1</sup>H NMR (400 MHz, D<sub>2</sub>O+TSP, δ): 5.74 (s, CH=C, 1H), 2.59 (t, *J* = 7.6 Hz, CH<sub>2</sub>, 2H), 2.46 (t, *J* = 7.4 Hz, CH<sub>2</sub>, 2H).

LC-MS/MS (ESI-, CID): Fragmentation of the 187 *m/z* [M-H]<sup>-</sup> molecular ion gave product ions with peaks at 143 *m/z* and 125 *m/z*.

#### **Trimethyl *trans*-homoaconitate** (trimethyl (1*E*)-but-1-ene-1,2,4-tricarboxylate).

<sup>1</sup>H NMR (400 MHz, CDCl<sub>3</sub>, δ): 6.82 (s, CH=C, 1H), 3.82 (s, OCH<sub>3</sub>, 3H), 3.78 (s, OCH<sub>3</sub>, 3H), 3.67 (s, OCH<sub>3</sub>, 3H), 3.09 (t, *J* = 7.7 Hz, CH=C-CH<sub>2</sub>, 2H), 2.54 (t, *J* = 7.8 Hz, CH<sub>2</sub>-CH<sub>2</sub>-CO-, 2H).

GC-MS (CI+, CH<sub>4</sub>) *m/z* (% relative intensity, ion): 139 (100%), 167 (85%), 199 (55%), 140 (7%), 231 (6%, MH<sup>+</sup>), 259 (6%, M + C<sub>2</sub>H<sub>5</sub><sup>+</sup>), 111 (3%).

GC-MS/MS (167 *m/z*): 139 (100%), 123 (21%), 110 (9%), 108 (6%).

NOE difference spectroscopy: Irradiation at 6.82 ppm shows no enhanced resonances. Irradiation at 3.09 ppm showed enhanced resonance at 2.54 ppm.

#### **Sodium *trans*-homoaconitate.**

<sup>1</sup>H NMR (400 MHz, D<sub>2</sub>O+TMS, δ): 6.51 (s, CH=C, 1H), 2.74 (t, *J* = 8.1 Hz, CH<sub>2</sub>, 2H), 2.54 (t, *J* = 7.9 Hz, CH<sub>2</sub>, 2H).

**Dimethyl 2-oxoadipate** (dimethyl 2-oxohexanoate).

$^1\text{H}$  NMR (400 MHz,  $\text{CDCl}_3$ +TMS,  $\delta$ ): 3.88 (s,  $\text{OCH}_3$ , 3H), 3.68 (s,  $\text{OCH}_3$ , 3H), 2.94 (t,  $J=7.1$  Hz,  $\text{CH}_2$ , 2H), 2.42-2.37 (m, 2H), 1.98 (quintet, 2H).

**Trimethyl *cis*-homo<sub>2</sub>-aconitate** (trimethyl (1*Z*)-pent-1-ene-1,2,5-tricarboxylate).

$^1\text{H}$  NMR (400 MHz,  $\text{CDCl}_3$ +TMS,  $\delta$ ): 5.80 (s,  $\text{CH}=\text{C}$ , 1H), 3.83 (s,  $\text{OCH}_3$ , 3H), 3.73 (s,  $\text{OCH}_3$ , 3H), 3.68 (s,  $\text{OCH}_3$ , 3H), 2.44 (m, 4H), 1.84, (quintet, 2H).

$^{13}\text{C}$  NMR (100 MHz,  $\text{CDCl}_3$ +TMS,  $\delta$ ): 173.2 ( $\text{OC}=\text{O}$ ), 169.0 ( $\text{OC}=\text{O}$ ), 165.3 ( $\text{OC}=\text{O}$ ), 149.4 (C-2), 120.2 (C-1), 52.4 (OMe), 51.9 (OMe), 51.6 (OMe), 33.5 ( $\text{CH}_2$ ), 32.8 ( $\text{CH}_2$ ), 22.3 (C-4).

GC-MS (CI+,  $\text{CH}_4$ )  $m/z$  (% relative intensity, ion): 152 (100%), 245 (51%,  $\text{MH}^+$ ), 124 (42%), 213 (34%,  $[\text{M}-\text{OCH}_3]^+$ ), 180 (22%), 185 (14%,  $[\text{M}-\text{C}(=\text{O})\text{OCH}_3]^+$ ).

GC-MS/MS (213  $m/z$ ): 152 (100%), 185 (76%). GC-MS/MS (180  $m/z$ ): 152 (100%), 124 (15%).

HRMS-CI ( $m/z$ ):  $\text{MH}^+$  calcd for  $\text{C}_{11}\text{H}_{17}\text{O}_6$  245.1025; found, 245.1027.

**Sodium *cis*-homo<sub>2</sub>-aconitate.**

$^1\text{H}$  NMR (400 MHz,  $\text{D}_2\text{O}$ +TSP,  $\delta$ ): 5.75 (s,  $\text{CH}=\text{C}$ , 1H), 2.47-2.34 (m, 4H), 1.77, (quintet, 2H).

**Trimethyl *trans*-homo<sub>2</sub>-aconitate** (trimethyl (1*E*)-pent-1-ene-1,2,5-tricarboxylate).

$^1\text{H}$  NMR (400 MHz,  $\text{CDCl}_3$ +TMS,  $\delta$ ): 6.79 (s,  $\text{CH}=\text{C}$ , 1H), 3.81 (s,  $\text{OCH}_3$ , 3H), 3.77 (s,  $\text{OCH}_3$ , 3H), 3.67 (s,  $\text{OCH}_3$ , 3H), 2.85 (t,  $J=7.6$  Hz,  $\text{CH}=\text{C}-\text{CH}_2$ , 2H), 2.44-2.34 (m, 4H), 1.83 (quintet, 2H).

GC-MS (CI+,  $\text{CH}_4$ )  $m/z$  (% relative intensity, ion): 152 (100%), 245 (74%,  $\text{MH}^+$ ), 124 (34%), 180 (28%), 213 (22%,  $[\text{M}-\text{OCH}_3]^+$ ), 185 (14%,  $[\text{M}-\text{C}(=\text{O})\text{OCH}_3]^+$ ).

HRMS-CI ( $m/z$ ):  $\text{MH}^+$  calcd for  $\text{C}_{11}\text{H}_{17}\text{O}_6$  245.1025; found, 245.1023.

**Sodium *trans*-homo<sub>2</sub>-aconitate.**

$^1\text{H}$  NMR (400 MHz,  $\text{D}_2\text{O}$ +TSP,  $\delta$ ): 6.39 (s,  $\text{CH}=\text{C}$ , 1H), 2.26-2.15 (m, 4H), 1.63, (quintet, 2H).

**Dimethyl 2-oxopimelate** (dimethyl 2-oxoheptanedioate).

$^1\text{H}$  NMR (400 MHz,  $\text{CDCl}_3$ +TMS,  $\delta$ ): 3.92 (s,  $\text{OCH}_3$ , 3H), 3.87 (s,  $\text{OCH}_3$ , 3H), 2.94 (t,  $J=6.9$  Hz,  $\text{CH}_2$ , 2H), 2.36-2.32 (m, 2H), 1.70-1.65 (m, 4H).

**Trimethyl *cis*-homo<sub>3</sub>-aconitate** (trimethyl (1*Z*)-hex-1-ene-1,2,6-tricarboxylate).  $^1\text{H}$  NMR (400 MHz,  $\text{CDCl}_3$ +TMS,  $\delta$ ): 5.84 (s,  $\text{CH}=\text{C}$ , 1H), 3.83 (s,  $\text{OCH}_3$ , 3H), 3.73 (s,  $\text{OCH}_3$ , 3H), 3.67 (s,  $\text{OCH}_3$ , 3H), 2.38 (t,  $J=6.9$  Hz, 2H), 2.35 (t,  $J=7.3$  Hz, 2H), 1.68 (quintet, 2H), 1.55 (quintet, 2H).

$^{13}\text{C}$  NMR (100 MHz,  $\text{CDCl}_3+\text{TMS}$ ,  $\delta$ ): 173.7 (OC=O), 169.2 (OC=O), 165.3 (OC=O), 150.2 (C-2), 119.5 (C-1), 52.3 (OMe), 51.8 (OMe), 51.6 (OMe), 34.0 ( $\text{CH}_2$ ), 33.6 ( $\text{CH}_2$ ), 26.4 ( $\text{CH}_2$ ), 24.1 ( $\text{CH}_2$ ).

GC-MS (CI+,  $\text{CH}_4$ )  $m/z$  (% relative intensity, ion): 227 (100%,  $[\text{M}-\text{OCH}_3]^+$ ), 199 (51%,  $[\text{M}-\text{C}(=\text{O})\text{OCH}_3]^+$ ), 287 (44%,  $[\text{M}+\text{C}_2\text{H}_5]^+$ ), 135 (23%), 195 (20%), 167 (12%), 299 (10%,  $[\text{M}+\text{C}_3\text{H}_5]^+$ ), 259 (6%,  $\text{MH}^+$ ).

HRMS-CI ( $m/z$ ):  $\text{MH}^+$  calcd for  $\text{C}_{12}\text{H}_{19}\text{O}_6$  259.1182; found, 259.1180.

**Trimethyl *trans*-homo<sub>3</sub>-aconitate** (trimethyl (1*E*)-hex-1-ene-1,2,6-tricarboxylate).

$^1\text{H}$  NMR (400 MHz,  $\text{CDCl}_3+\text{TMS}$ ,  $\delta$ ): 6.76 (s,  $\text{CH}=\text{C}$ , 1H), 3.81 (s,  $\text{OCH}_3$ , 3H), 3.77 (s,  $\text{OCH}_3$ , 3H), 3.67 (s,  $\text{OCH}_3$ , 3H), 2.36-2.31 (m, 4H), 1.71-1.63 (m, 4H).

GC-MS (CI+,  $\text{CH}_4$ )  $m/z$  (% relative intensity, ion): 227 (100%,  $[\text{M}-\text{OCH}_3]^+$ ), 199 (78%,  $[\text{M}-\text{C}(=\text{O})\text{OCH}_3]^+$ ), 287 (60%,  $[\text{M}+\text{C}_2\text{H}_5]^+$ ), 259 (50%,  $\text{MH}^+$ ), 135 (42%), 195 (30%), 167 (24%), 299 (10%,  $[\text{M}+\text{C}_3\text{H}_5]^+$ ).

HRMS-CI ( $m/z$ ):  $\text{MH}^+$  calcd for  $\text{C}_{12}\text{H}_{19}\text{O}_6$  259.1182; found, 259.1179.

***cis*-Homo<sub>3</sub>-aconitic acid (free acid).**

$^1\text{H}$  NMR (400 MHz,  $\text{D}_2\text{O}+\text{TSP}$ ,  $\delta$ ): 5.94 (s,  $\text{CH}=\text{C}$ , 1H), 2.45-2.39 (m, 4H), 1.69-1.61 (m, 2H), 1.59-1.53 (m, 2H).

***trans*-Homo<sub>3</sub>-aconitic acid (free acid).**

$^1\text{H}$  NMR (400 MHz,  $\text{D}_2\text{O}+\text{TSP}$ ,  $\delta$ ): 6.75 (s,  $\text{CH}=\text{C}$ , 1H), 2.46-2.38 (m, 4H), 1.68-1.58 (m, 2H), 1.56-1.48 (m, 2H).

**Dimethyl 2-oxosuberate** (dimethyl 2-oxooctanedioate).

$^1\text{H}$  NMR (400 MHz,  $\text{CDCl}_3+\text{TMS}$ ,  $\delta$ ): 3.92 (s,  $\text{OCH}_3$ , 3H), 3.87 (s,  $\text{OCH}_3$ , 3H), 2.86 (t,  $J=7.4$  Hz, 2H), 2.34-2.28 (m, 2H), 1.69-1.61 (m, 4H), 1.41-1.34 (m, 2H).

GC-MS (CI+,  $\text{CH}_4$ )  $m/z$  (% relative intensity, ion): 125 (100%), 217 (50%,  $\text{MH}^+$ ), 157 (42%,  $[\text{M}-\text{C}(=\text{O})\text{OCH}_3]^+$ ), 185 (40%,  $[\text{M}-\text{OCH}_3]^+$ ), 245 (18%,  $[\text{M}+\text{C}_3\text{H}_5]^+$ ).

**2-Oxosuberic acid** (2-oxooctanedioic acid).

$^1\text{H}$  NMR (400 MHz,  $\text{D}_2\text{O}+\text{TSP}$  adjusted to pD = 7 with sodium deuterioxide,  $\delta$ ): 2.76 (t,  $J=7.2$  Hz, 2H), 2.45 (t,  $J=7.4$  Hz, 2H), 1.58 (m, 4H), 1.34 (pentet, 2H).

$^{13}\text{C}$  NMR (100 MHz,  $\text{D}_2\text{O}+\text{TSP}$  adjusted to pD = 7 with sodium deuterioxide,  $\delta$ ): 208.0 (C-2), 182.7 (C-8), 171.1 (C-1), 39.2, 36.5, 28.3, 25.3, 22.7 (C-3 to C-7).

**Trimethyl *cis*-homo<sub>4</sub>-aconitate** (trimethyl (1*Z*)-hept-1-ene-1,2,7-tricarboxylate).

$^1\text{H}$  NMR (400 MHz,  $\text{CDCl}_3$ +TMS,  $\delta$ ): 5.82 (s, CH=C, 1H), 3.83 (s,  $\text{OCH}_3$ , 3H), 3.72 (s,  $\text{OCH}_3$ , 3H), 3.67 (s,  $\text{OCH}_3$ , 3H), 2.37 (t,  $J=7.1$  Hz), 2.32 (t,  $J=7.4$  Hz), 1.65 (quintet, 2H), 1.53 (quintet, 2H), 1.38 (m, 2H).

$^{13}\text{C}$  NMR (100 MHz,  $\text{CDCl}_3$ +TMS,  $\delta$ ): 173.9 (OC=O), 169.3 (OC=O), 165.4 (OC=O), 150.7 (C-2), 119.4 (C-1), 52.3 (OMe), 51.8 (OMe), 51.5 (OMe), 34.2 ( $\text{CH}_2$ ), 33.9 ( $\text{CH}_2$ ), 28.4 ( $\text{CH}_2$ ), 26.7 ( $\text{CH}_2$ ), 24.6 ( $\text{CH}_2$ ).

GC-MS (CI+,  $\text{CH}_4$ )  $m/z$  (% relative intensity, ion): 241 (100%,  $[\text{M}-\text{OCH}_3]^+$ ), 213 (55%,  $[\text{M}-\text{C}(=\text{O})\text{OCH}_3]^+$ ), 301 (50%,  $[\text{M}+\text{C}_2\text{H}_5^+]$ ), 149 (30%), 181 (15%), 209 (12%), 313 (10%,  $[\text{M}+\text{C}_3\text{H}_5^+]$ ), 273 (5%,  $\text{MH}^+$ ).

HRMS-CI ( $m/z$ ):  $\text{MH}^+$  calcd for  $\text{C}_{13}\text{H}_{21}\text{O}_6$  273.1338; found, 273.1340.

***cis*-Homo<sub>4</sub>-aconitic acid (free acid).**

$^1\text{H}$  NMR (400 MHz,  $\text{D}_2\text{O}$ +TSP,  $\delta$ ): 5.92 (s, CH=C, 1H), 2.39 (m, 4H), 1.62 (quintet, 2H), 1.53 (quintet, 2H), 1.37 (quintet, 2H).

***(R)*-Homocitrate.**

LC-MS/MS (ESI-, CID): Fragmentation of the 205  $m/z$   $[\text{M}-\text{H}]^-$  molecular ion gave product ions with peaks at 187  $m/z$  ( $[\text{M}-\text{OH}]^-$ ), 143  $m/z$  ( $[\text{M}-\text{OH}-\text{CO}_2]^-$ ) and 125  $m/z$  ( $[\text{M}-\text{OH}-\text{CO}_2-\text{H}_2\text{O}]^-$ ).

**Supplementary Table 1: Oligodeoxyribonucleotide primers**

| <b>Primer name</b> | <b>Sequence<sup>1</sup></b>  |
|--------------------|------------------------------|
| 5MJ1596BN          | GGTGGATCCATATGATGAAGGTGTGTG  |
| 3MJ1596B           | GGTGGATCCTCAATATCCCTTTAACTTC |

<sup>1</sup> Restriction sites are underlined and the initiator codon is shown in italics.

**Supplementary Table 2: List of plasmids and microorganisms**

| <b>Strain or plasmid</b>                      | <b>Description</b>                                                                                    | <b>Reference or source</b> |
|-----------------------------------------------|-------------------------------------------------------------------------------------------------------|----------------------------|
| <i>Methanocaldococcus jannaschii</i><br>JAL-1 | Wild-type                                                                                             | DSM 2661                   |
| <i>Escherichia coli</i><br>DH5 $\alpha$       | General cloning host                                                                                  | Invitrogen                 |
| BL21 (DE3)                                    | Protein expression host                                                                               | Novagen                    |
| ArcticExpress (DE3)-RIL                       | Host for low-temperature protein expression with chaperones                                           | Stratagene                 |
| Plasmids                                      |                                                                                                       |                            |
| pET-19b                                       | Expression vector for proteins with an N-terminal decahistidine tag                                   | Novagen                    |
| pET-43.1c                                     | Expression vector for proteins with an N-terminal NusA fusion and hexahistidine tag                   | Novagen                    |
| pDG141                                        | MJ1003 cloned into NdeI/KpnI sites of pCDF-Duet1                                                      | (1)                        |
| pDG160                                        | MJ1271 cloned into NcoI/BamHI sites of pET-19b                                                        | (1)                        |
| pDG162                                        | MJ1277 cloned into NcoI/BamHI sites of pET-19b                                                        | (1)                        |
| pDG130                                        | MJ1596 PCR product obtained using primers 5MJ1596BN and 3MJ1596B cloned into BamHI site of pET-43.1c. | This study                 |
| pDG131                                        | pDG130 with the 1659 bp NdeI fragment deleted.                                                        | This study                 |
| pDG382                                        | MJ1596 PCR product cloned into NdeI/BamHI sites of pET-19b                                            | This study                 |
| pT7-MJ1596                                    | MJ1596 cloned in expression vector pT7-7                                                              | (2)                        |

## Phylogenetic analysis of archaeal small-subunit hydro-lyase homologs

An alignment of 34 homologs of the small IPMI subunit was prepared using the T-Coffee program (ver. 5.57) (3). From the full alignment 164 positions that were deemed to be confidently aligned were chosen for phylogenetic analysis. The phylogeny was inferred using the proml program or the protdist and neighbor programs (with 100 bootstrap replicates) from the Phylip package (ver. 3.66) (4). Both programs used the Jones-Taylor-Thornton model of amino acid changes and assumed a  $\gamma$ -distribution of rates ( $\alpha=2.4$ ) approximated by three states.

Sequences of small subunit homologs (and their RefSeq accession numbers) were from *Archaeoglobus fulgidus* (NP\_070589.1 and NP\_069463.1), *Caldivirga maquilingensis* (YP\_001540990.1), *Metallosphaera sedula* (YP\_001190928.1), *Candidatus Methanoregula boonei* (YP\_001403761.1 and YP\_001405233.1), *Methanobrevibacter smithii* (YP\_001273420.1 and YP\_001273872.1), *Methanocaldococcus jannaschii* (NP\_248267.1 and NP\_248273.1), *Methanococcoides burtonii* (YP\_566232.1 and YP\_566284.1) *Methanococcus maripaludis* (NP\_987501.1 and NP\_987256.1), *Methanococcus vannielii* (YP\_001323877.1 and YP\_001323653.1), *Methanocorpusculum labreanum* (YP\_001029677.1 and YP\_001030049.1), *Methanosaeta thermophila* (ZP\_01153511.1 and ZP\_01153233.1), *Methanosarcina acetivorans* (NP\_618624.1, NP\_616162.1 and NP\_615175.1), *Methanosphaera stadtmanae* (YP\_447420.1 and YP\_448498.1), *Methanospirillum hungatei* (YP\_503239.1 and YP\_503785.1), *Methanothermobacter thermautotrophicus* (NP\_275966.1 and NP\_276503.1), *Pyrobaculum aerophilum* (NP\_559684.1), *Pyrococcus furiosus* (NP\_579409.1 and NP\_578668.1), *Sulfolobus solfataricus* (NP\_343817.1), *Thermococcus kodakarensis* (YP\_182694.1). For each genome with multiple paralogs, the predicted HACN subunit accession number is listed first, followed by the IPMI subunit.

## References for Supplementary Materials

1. Drevland, R. M., Waheed, A., and Graham, D. E. (2007) *J. Bacteriol.* **189**, 4391-4400
2. Howell, D. M., Graupner, M., Xu, H., and White, R. H. (2000) *J. Bacteriol.* **182**, 5013-5016
3. Notredame, C., Higgins, D. G., and Heringa, J. (2000) *J. Mol. Biol.* **302**, 205-217
4. Felsenstein, J. (2005) PHYLIP (phylogeny inference package). 3.67 Ed., Department of Genetics, University of Washington, Seattle
